# Supplementary material for: CREB drives acinar cells to ductal reprogramming and promotes pancreatic cancer progression in preclinical models of alcoholic pancreatitis
Source: PubMed Central journal article supplement — bioRxiv. 2025 Jul 14:2024.01.05.574376. Originally published 2024 Jan 5. Preprint. [Version 4] doi: 10.1101/2024.01.05.574376 (PMC11188065; doi:10.1101/2024.01.05.574376), 2025-07-14
Supplement: media-1.pdf [file media-1.pdf]

## Supplementary Material

### Supplementary Figure Legends

**Supplementary Figure S1.** Comparative analysis of severe damage mediated by alcoholic chronic pancreatitis (ACP) as compared to the impact of alcohol or CP alone in *Ptfla<sup>CreERTM/+</sup>* mice. (A) Dot plot depicting initial and final body weight measurements in mice treated with vehicle, alcohol (A), caerulein (CP), or ACP with 3 and 21 days of recovery periods (n=7 mice per group). (B) Blood alcohol concentration levels (mg/dL) shown in ctrl, A, and ACP-induced *Ptfla<sup>CreERTM/+</sup>* mice, (n=7-9 mice per group). (C and D) Relative pancreas weight measurements of *Ptfla<sup>CreERTM/+</sup>* mice in ctrl, A, CP, and ACP-induced groups (C) with 3 and 21 days of recovery periods (D), (n=5-7 mice per group). (E) Measurements of serum amylase activity in ctrl, A, CP and ACP-induced mice, (3-day recovery), (n=6 mice per group). (F) Representative images depicting H&E with histological images (*left*) and quantification (*right*) of CK19<sup>+</sup> ducts, PanINs (Alcian Blue), and  $\alpha$ SMA, collagen (Sirius red) and immune cells (CD45<sup>+</sup>) in pancreata of control, A, CP and ACP-induced *Ptfla<sup>CreERTM/+</sup>* mice, (3-day recovery), (n=4 mice per group). Scale bar, 50 $\mu$ m. <sup>ns</sup>nonsignificant; \*p<0.05; \*\*p< 0.01; \*\*\*p<0.001; \*\*\*\*p<0.0001 by ANOVA and unpaired t test.

**Supplementary Figure S2.** Molecular profiling of *Ptfla<sup>CreERTM/+</sup>* mice pancreata after experimental induction of ACP. (A) Quantitative (qPCR) analysis in pancreas tissue harvested from control and ACP-induced *Ptfla<sup>CreERTM/+</sup>* mice, (n=3 mice per group). (B) Representative image of mouse kinase array membranes (*top*) and its quantification (*bottom*) in control and ACP induced pancreata. Scale bar, 50 $\mu$ m. <sup>ns</sup> nonsignificant; \*p<0.05; \*\*p< 0.01; \*\*\*p<0.001;\*\*\*\*p<0.0001 by ANOVA and unpaired t test.

**Supplementary Figure S3.** Comparative analysis of pancreatic damage mediated by ACP as compared to the impact of alcohol or CP alone in *KC* mice. (A) Blood alcohol concentration measurement (mg/dL) in ctrl, alcohol alone (A), and ACP-induced *KC* mice with n = 6-7 mice per group. (B) Representative pancreas images displaying H&E, images (*left*) and quantification (*right*) of CK19<sup>+</sup> ducts, PanINs (Alcian Blue), collagen (Sirius red),  $\alpha$ SMA, and immune cells positivity (CD45<sup>+</sup>) in the pancreata of ctrl, A, CP, and ACP-induced *KC* experimental cohorts, (3-day recovery), (n=4-7 mice per group). (C) Comparative histological evaluation of mouse pancreas

using H&E based analysis (B), (n=3 mice per group). (D) Bubble plot outlining the expression of canonical lineage cell cluster annotations in *KC* scRNA seq dataset. Scale bar, 50 $\mu$ m. <sup>ns</sup> nonsignificant; \*p<0.05; \*\*p<0.01; \*\*\*p<0.001; \*\*\*\*p<0.0001 by ANOVA.

**Supplementary Figure S4.** Histological profiling of *Ptfla*<sup>CreERTM/+</sup>;*Creb*<sup>fl/fl</sup> (*CC*<sup>-/-</sup>) mice pancreata with ACP induction. (A) Mouse breeding strategy to generate a genetic knockout of acinar cell specific *Creb*, under a *Ptfla*<sup>CreERTM/+</sup> promoter. (B) Representative images of the mouse pancreas with H&E staining, along with co-immunofluorescence of total CREB expression (tCREB, red) and DAPI (blue), in control *Ptfla*<sup>CreERTM/+</sup> (C) and *CC*<sup>-/-</sup> mice. (C) Comparative histological evaluation of mouse pancreas, accompanied by representative photomicrographs, showcasing H&E, CK19<sup>+</sup> ducts, Sirius Red,  $\alpha$ SMA, and CD45<sup>+</sup> staining within the pancreata of control (C) and *CC*<sup>-/-</sup> mice, in control or with ACP induction (3-day recovery)(*left*) and their quantification (*right*), (n=4 mice per group). Scale bar, 50 $\mu$ m. <sup>ns</sup> nonsignificant; \*\*\*\*p<0.0001 by ANOVA.

**Supplementary Figure S5.** Pancreas weight of *KC* and *Ptfla*<sup>CreERTM/+</sup>; *LSL-Kras*<sup>G12D/+</sup>; *Creb*<sup>fl/fl</sup> (*KCC*<sup>-/-</sup>) mice with ACP induction. (A) Schematic showing ACP induction and recovery phases in *KC* and *KCC*<sup>-/-</sup> mice. (B) Comparison of relative pancreas weight measurements in all experimental cohorts (n=3-5 mice per group). (C) Representative photomicrographs of whole pancreas depicting significantly less tumor burden in *KCC*<sup>-/-</sup> as compared to *KC* mice with ACP induction. Scale bar, 50 $\mu$ m. <sup>ns</sup> nonsignificant; \*\*\*p<0.001; \*\*\*\*p<0.0001 by ANOVA.

**Supplementary Figure S6.** Raw uncropped images of Western blot membranes for Figure 1F and 3B.

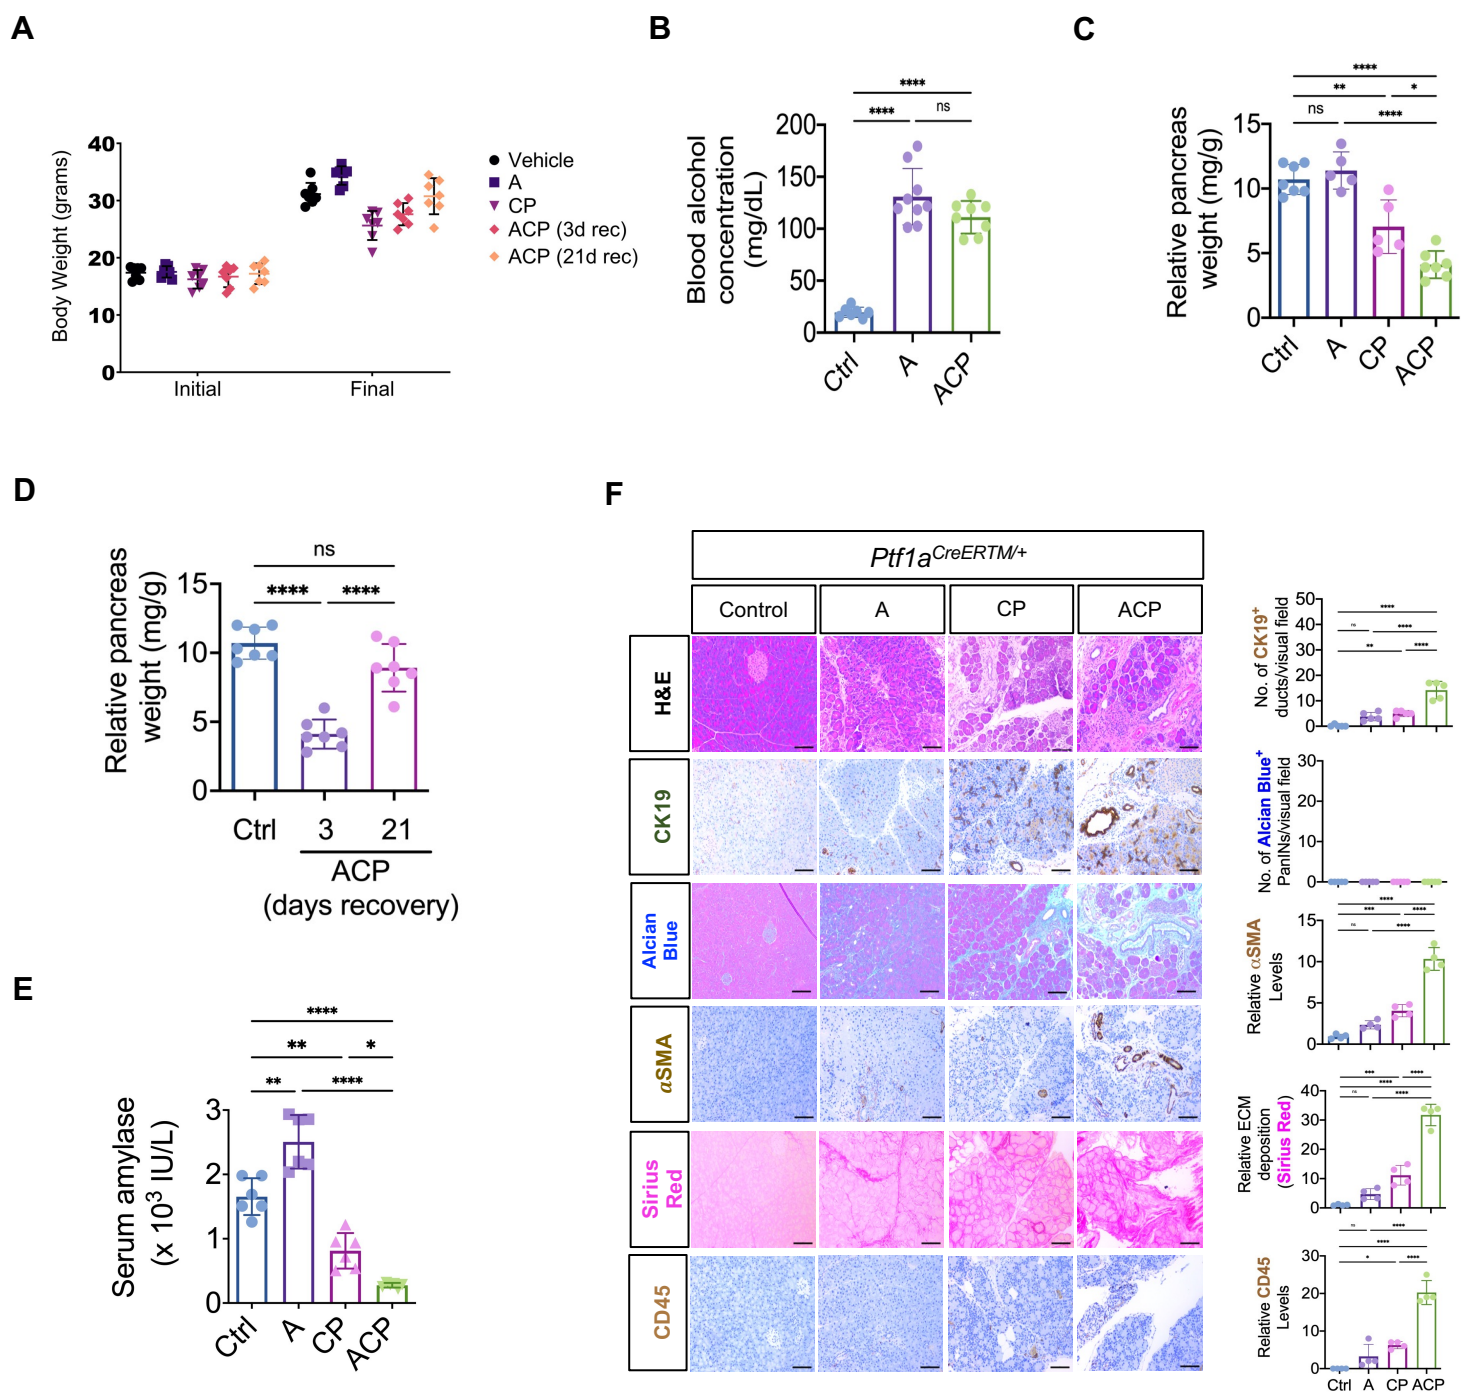

Supplementary Figure S1

**A**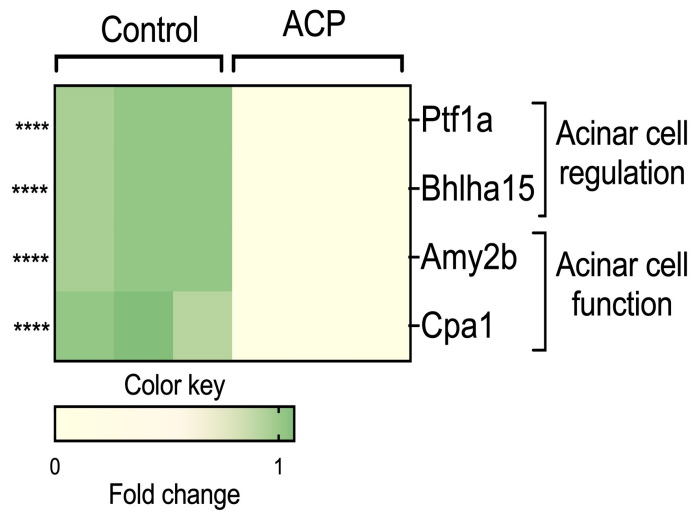**B**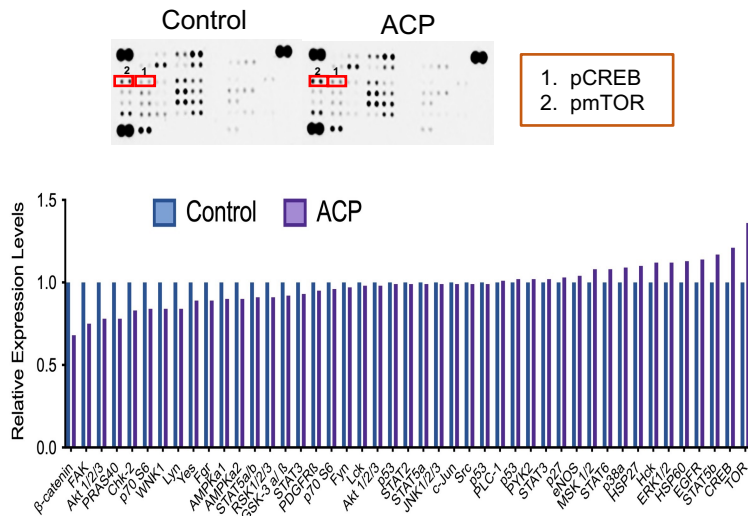**Supplementary Figure S2**

**A**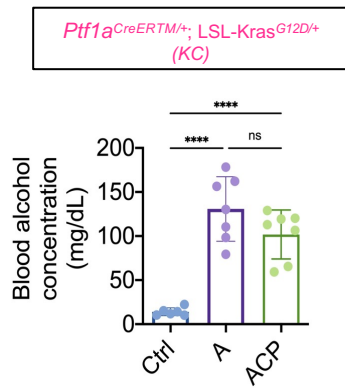**B**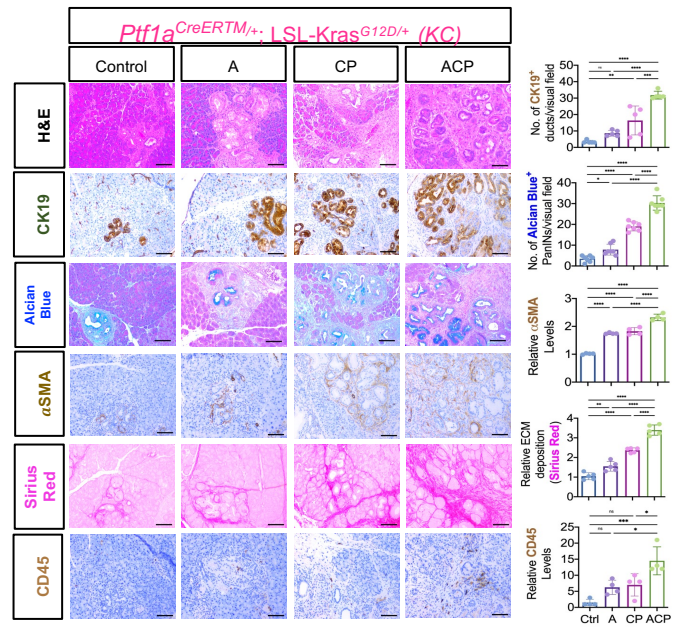**C**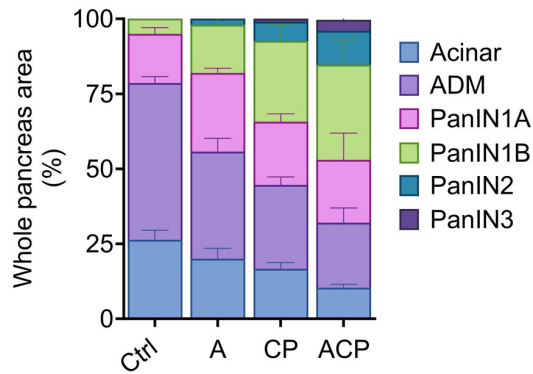**D**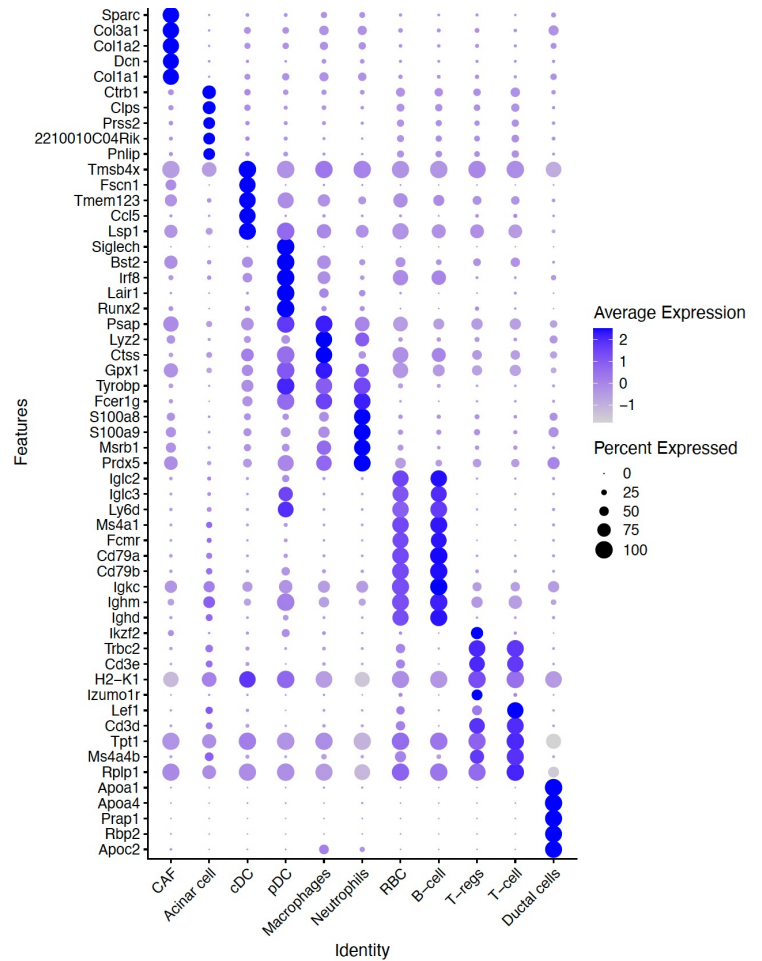

**A**

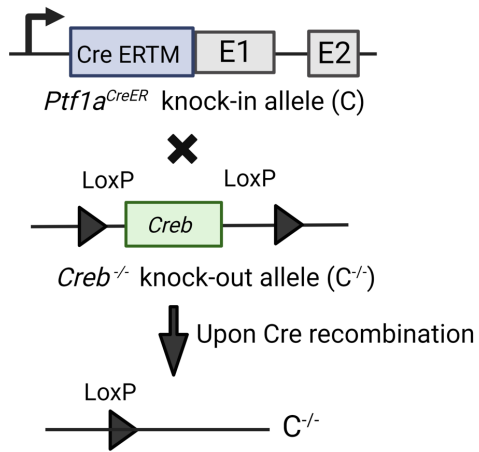

**B**

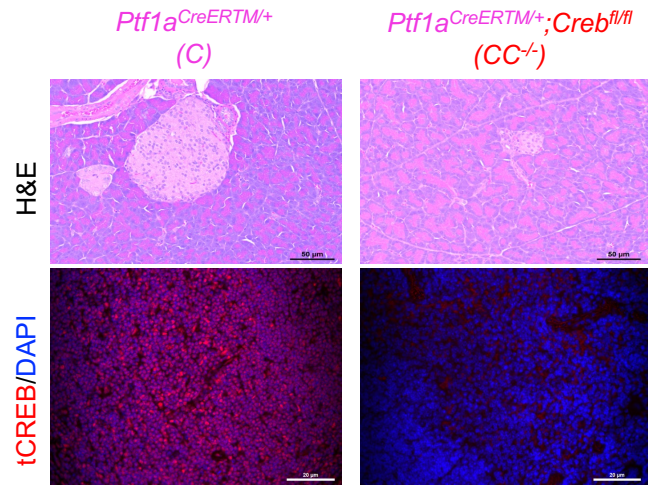

**C**

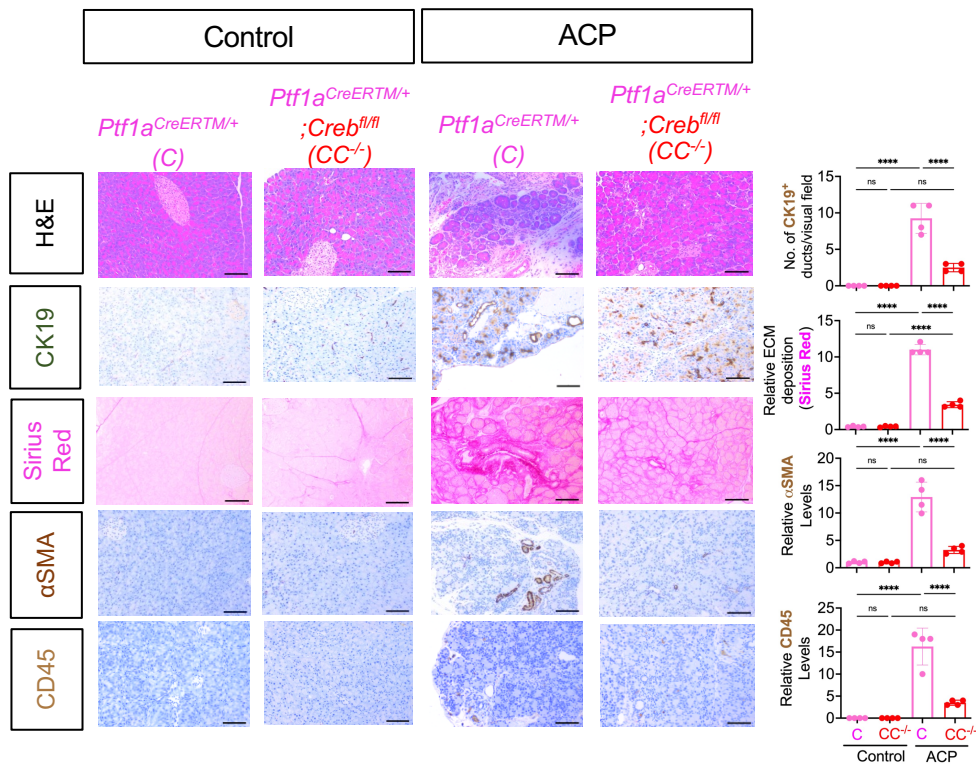

**Supplementary Figure S4**

**A**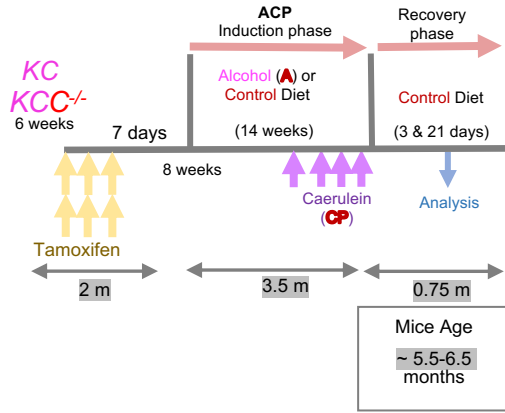**B**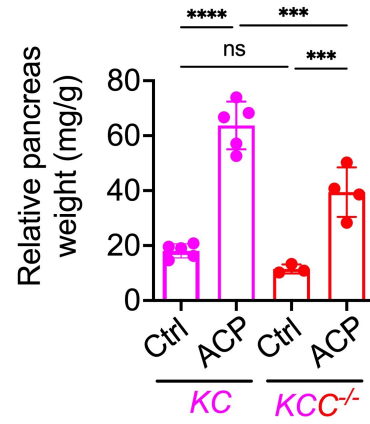**C**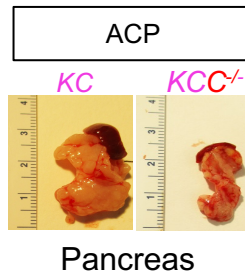**Supplementary Figure S5**

Figure- 1F

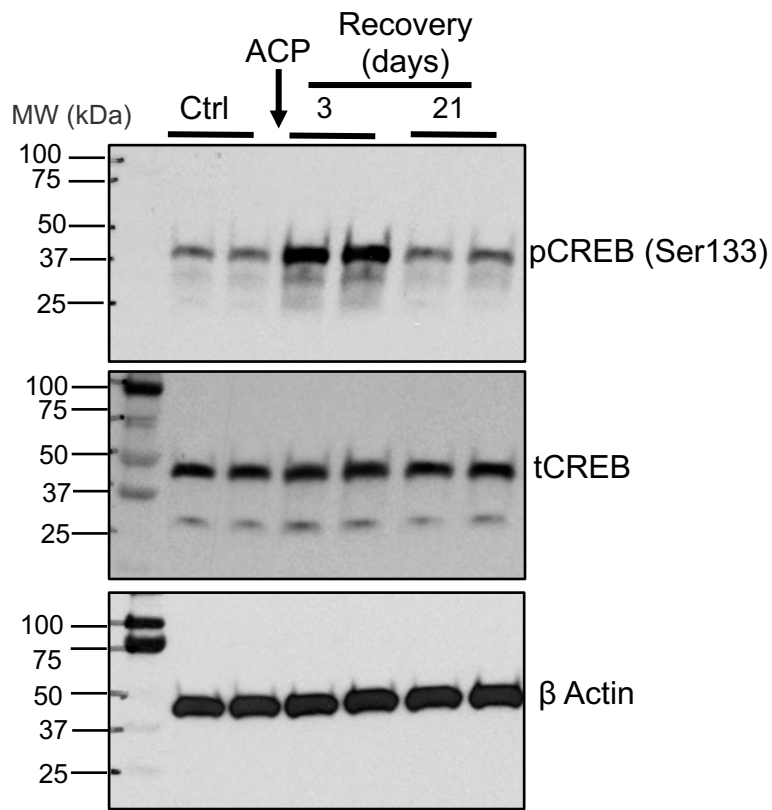

Figure- 3B

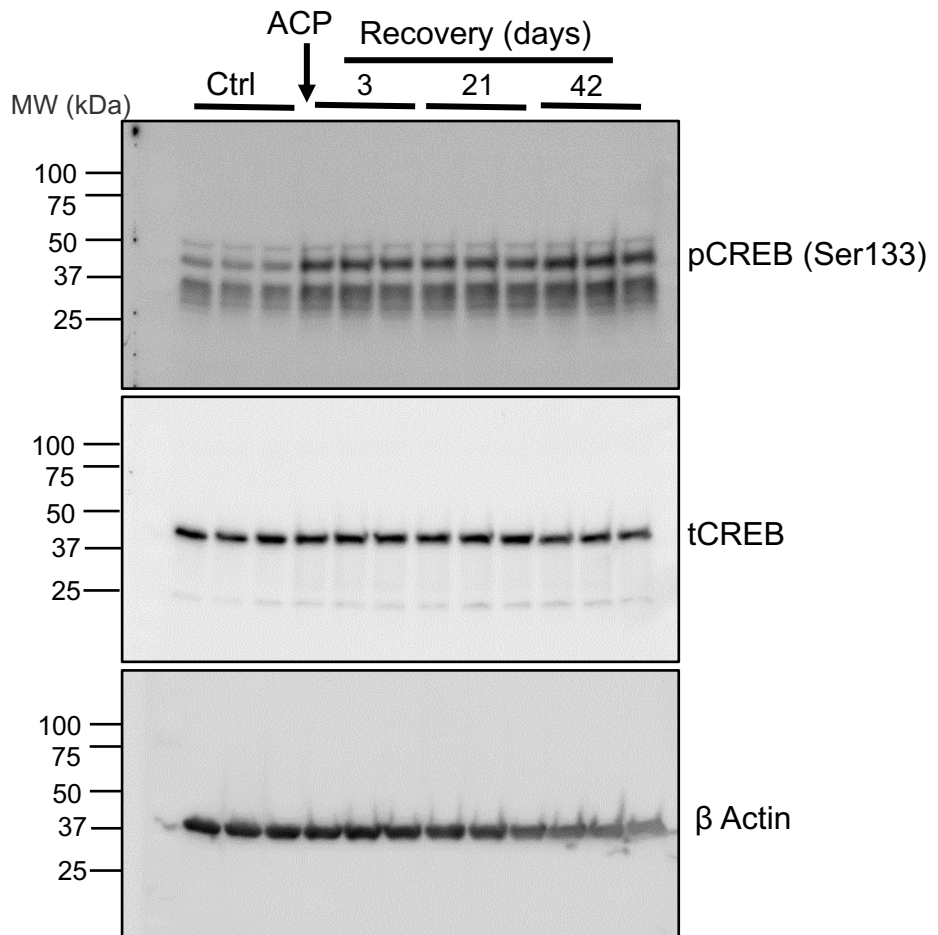

Supplementary Figure S6



## Supplementary Tables

**Supplementary Table S1.** Sequence of probes used for mice genotyping analysis.

| Gene                       | Forward primer               | Reverse primer             |
|----------------------------|------------------------------|----------------------------|
| <i>Cre</i>                 | GAA GGC ATT TGT GTA GGG TCA  | GGC TGA GTG AGG GTT GTG AG |
| <i>Creb<sup>fl</sup></i>   | CTCTTCTTGCATCAAGCTTGGT       | AGATCCCTCTAGGCATTTCTTCCT   |
| <i>Creb<sup>WT</sup></i>   | CCAGTTACCTTCTAGGGAGCAGCTTACA | CAGGCCTGAGGTCTGGCTTCA      |
| <i>Kras<sup>G12D</sup></i> | GGCCTGCTGAAAATGACTGAGTATA    | CTGTATCGTCAAGGCGCTCTT      |
| <i>Rosa<sup>EYFP</sup></i> | AGG GCG AGG AGC TGT TCA      | TGA AGT CGA TGC CCT TCA G  |

**Supplementary Table S2.** List of treatment groups from ACP induction and recovery periods.

| Groups | Induction period                                        | Recovery period                | Group Abbreviation                                 |
|--------|---------------------------------------------------------|--------------------------------|----------------------------------------------------|
| 1      | Control diet<br>(14 weeks)                              | Continued control<br>diet      | <b>Ctrl</b>                                        |
| 2      | Alcohol diet<br>(14 weeks)                              | Control diet<br>(3 or 21 days) | <b>A</b>                                           |
| 3      | Control diet +<br>Caerulein injections<br>(for 4 weeks) | Continued control<br>diet      | <b>CP</b>                                          |
| 4      | Alcohol diet +<br>Caerulein injections<br>(for 4 weeks) | Control diet<br>(3 or 21 days) | ACP<br>(3- or 21-days<br>recovery)<br>= <b>ACP</b> |
| 5      | Alcohol diet +<br>Caerulein injections<br>(for 4 weeks) | Control diet<br>(3 days)       | ACP<br>(3-days recovery)<br>= <b>ACP + 3d</b>      |
| 6      | Alcohol diet +<br>Caerulein injections<br>(for 4 weeks) | Control diet<br>(21 days)      | ACP<br>(21-days recovery)<br>= <b>ACP + 21d</b>    |

**Supplementary Table S3.** Primary antibodies for Western blot, immunohistochemistry, and immunofluorescence analysis.

| <b>Primary antibodies</b> | <b>Supplier</b> | <b>Species</b> | <b>Catalogue Number</b> |
|---------------------------|-----------------|----------------|-------------------------|
| Phospho-CREB (Ser 133)    | Cell signaling  | Rabbit         | 9198                    |
| Total-CREB                | Cell signaling  | Rabbit         | 9197                    |
| Actin                     | Cell signaling  | Mouse          | 3700                    |
| CK19                      | EMD Millipore   | Rat            | MABT913                 |
| GFP                       | Aves labs       | Chicken        | GFP-1010                |
| $\alpha$ -amylase         | Cell signaling  | Rabbit         | 3796                    |
| CD45                      | Cell signaling  | Rabbit         | 70257                   |
| $\alpha$ -SMA             | Cell signaling  | Rabbit         | 19245                   |

**Supplementary Table S4.** Mouse Primers used in the study (Qiagen Catalogue#330001).

| <b>Primers</b> | <b>Company</b> | <b>Gene Globe-ID</b> |
|----------------|----------------|----------------------|
| Amy2b          | Qiagen         | PPM66197A-200        |
| Ptf1a          | Qiagen         | PPM29825A-200        |
| Alb            | Qiagen         | PPM60179A-200        |
| Bhlh1a15       | Qiagen         | PPM41737A-200        |
| Krt19          | Qiagen         | PPM02968A-200        |
| Sox9           | Qiagen         | PPM05134D-200        |
| Aldh1a3        | Qiagen         | PPM31491A-200        |
| Spp1           | Qiagen         | PPM03648C-200        |
| Tspan8         | Qiagen         | PPM26276B-200        |
| Hes1           | Qiagen         | PPM05647A-200        |
| Prss1          | Qiagen         | PPM67018A-200        |
| Cpa1           | Qiagen         | PPM26764A-200        |
